## STEM CELLS AND REGENERATION

## RESEARCH ARTICLE

Linking the environment, DAF-7/TGF $\beta$  signaling and LAG-2/DSL ligand expression in the germline stem cell nicheOlga Pekar<sup>1</sup>, Maria C. Ow<sup>2</sup>, Kailyn Y. Hui<sup>3</sup>, Marcus B. Noyes<sup>3</sup>, Sarah E. Hall<sup>2</sup> and E. Jane Albert Hubbard<sup>1,\*</sup>

## ABSTRACT

The developmental accumulation of proliferative germ cells in the *C. elegans* hermaphrodite is sensitive to the organismal environment. Previously, we found that the TGF $\beta$  signaling pathway links the environment and proliferative germ cell accumulation. Neuronal DAF-7/TGF $\beta$  causes a DAF-1/TGF $\beta$ R signaling cascade in the gonadal distal tip cell (DTC), the germline stem cell niche, where it negatively regulates a DAF-3 SMAD and DAF-5 Sno-Ski. LAG-2, a founding DSL ligand family member, is produced in the DTC and activates the GLP-1/Notch receptor on adjacent germ cells to maintain germline stem cell fate. Here, we show that DAF-7/TGF $\beta$  signaling promotes expression of *lag-2* in the DTC in a *daf-3*-dependent manner. Using ChIP and one-hybrid assays, we find evidence for direct interaction between DAF-3 and the *lag-2* promoter. We further identify a 25 bp DAF-3 binding element required for the DTC *lag-2* reporter response to the environment and to DAF-7/TGF $\beta$  signaling. Our results implicate DAF-3 repressor complex activity as a key molecular mechanism whereby the environment influences DSL ligand expression in the niche to modulate developmental expansion of the germline stem cell pool.

**KEY WORDS:** GLP-1/Notch, SMAD, DAF-3, *C. elegans*, Sno-Ski

## INTRODUCTION

To maintain tissues, stem cells and their dividing progeny are tightly regulated. In addition to direct signals from the stem cell niche, global signals reporting environmental and physiological conditions can influence the outcome of stem cell decisions (Drummond-Barbosa, 2008; Hubbard et al., 2012; Laws and Drummond-Barbosa, 2017). However, our understanding of the mechanisms underlying this regulation remains incomplete.

The *C. elegans* germ line is a powerful model for exploring how stem cell behavior is influenced by the combined action of signaling from the local niche and by organismal cues that report physiologically relevant conditions. In hermaphrodites, a single distal tip cell (DTC) caps each of the two gonad arms and functions as the germline stem cell niche. DTC-to-germline signaling via the Notch pathway and gap junctions governs stem cell fate and proliferation (Kimble and White, 1981; Austin and Kimble, 1987; Starich et al., 2014). At least two of the 10 DSL family ligands in the *C. elegans* genome (Chen and Greenwald, 2004), LAG-2 and APX-1, are produced by the DTC and activate the GLP-1/Notch receptor

on the surface of germ cells to maintain germline stem cell fate (Henderson et al., 1994; Nadarajan et al., 2009). The DAF-7/TGF $\beta$  signaling pathway was identified for its role in dauer formation (Larsen et al., 1995). If animals meet unfavorable conditions as early larvae, the resulting decrease in DAF-7/TGF $\beta$  signaling promotes formation of the stress-resistant, non-aging dauer larva. In this role, DAF-7 signals through the DAF-1 type I and DAF-4 type II receptors and DAF-8 and DAF-14 R-Smads to negatively regulate a DAF-3 SMAD/DAF-5 Sno-Ski transcriptional repressor complex (Gumieny, 2013). We identified the DAF-7/TGF $\beta$  signaling pathway in a genetic screen for genes that modulate the accumulation of proliferative germ cells in later larval stages, after the time that the dauer decision is made (Dalfó et al., 2012). In this role, it uses the same components and regulatory logic as in dauer formation (Fig. 1A), but the DAF-1/TGF $\beta$ R complex and downstream transcriptional regulators act in the DTC (Dalfó et al., 2012). Unlike the DAF-2/insulin-IGF-like signaling pathway that also influences larval germline progenitor cell accumulation (Hubbard et al., 2012; Michaelson et al., 2010), DAF-7/TGF $\beta$  signaling influences germline stem cell fate and not the rate of germ cell cycle progression. Finally, in at least one genetic scenario DAF-7/TGF $\beta$  can act independently of the GLP-1/Notch receptor.

Here, we report that TGF $\beta$  receptor signaling promotes the expression of *lag-2* in the late larval DTC, defining a direct mechanistic link between TGF $\beta$  and Notch signaling. We also extend previous findings on the transcriptional regulation of *lag-2*. We find that DTC expression of *lag-2* is reduced when TGF $\beta$  signaling is low but is restored in the absence of *daf-3* or *daf-5*. Similarly, *lag-2* reporter expression is reduced in unfavorable environments, in a manner dependent on *daf-3*. Using one-hybrid and ChIP assays, we find evidence for direct interaction between DAF-3 and the *lag-2* promoter. Using transcriptional reporters, we define a TGF $\beta$  response element in the *lag-2* promoter and show that eliminating one of two potential DAF-3-binding sites abrogates the response to TGF $\beta$  receptor signaling and to low food, suggesting that it may serve as a direct target for the TGF $\beta$  pathway within the *lag-2* promoter. We propose a working model and discuss our findings in the context of previous work, of TGF $\beta$ -Notch and environment-Notch interactions in general.

## RESULTS

DAF-7/TGF $\beta$  signaling promotes *lag-2* expression

We sought to determine the mechanistic link between TGF $\beta$ R signaling in the DTC and germline stem cell maintenance. Previously, we showed that TGF $\beta$ R signaling in the DTC promotes germ cell accumulation during late larval stages by preventing germ cell differentiation. Our previous work suggested that the TGF $\beta$ R can act in parallel to GLP-1/Notch (Dalfó et al., 2012). This conclusion was based on: (1) the observation that reducing TGF $\beta$  signaling in a *glp-1(null)* mutant, which was also mutant for *gld-1* and *gld-2*, to permit production and maintenance of

<sup>1</sup>Skirball Institute of Biomolecular Medicine and Department of Cell Biology, NYU School of Medicine, New York, NY 10016, USA. <sup>2</sup>Department of Biology, Syracuse University, Syracuse, NY 13244, USA. <sup>3</sup>Institute for Systems Genetics, NYU School of Medicine, New York, NY 10016, USA.

\*Author for correspondence (jane.hubbard@med.nyu.edu)

DOI: 10.1242/dev.147660

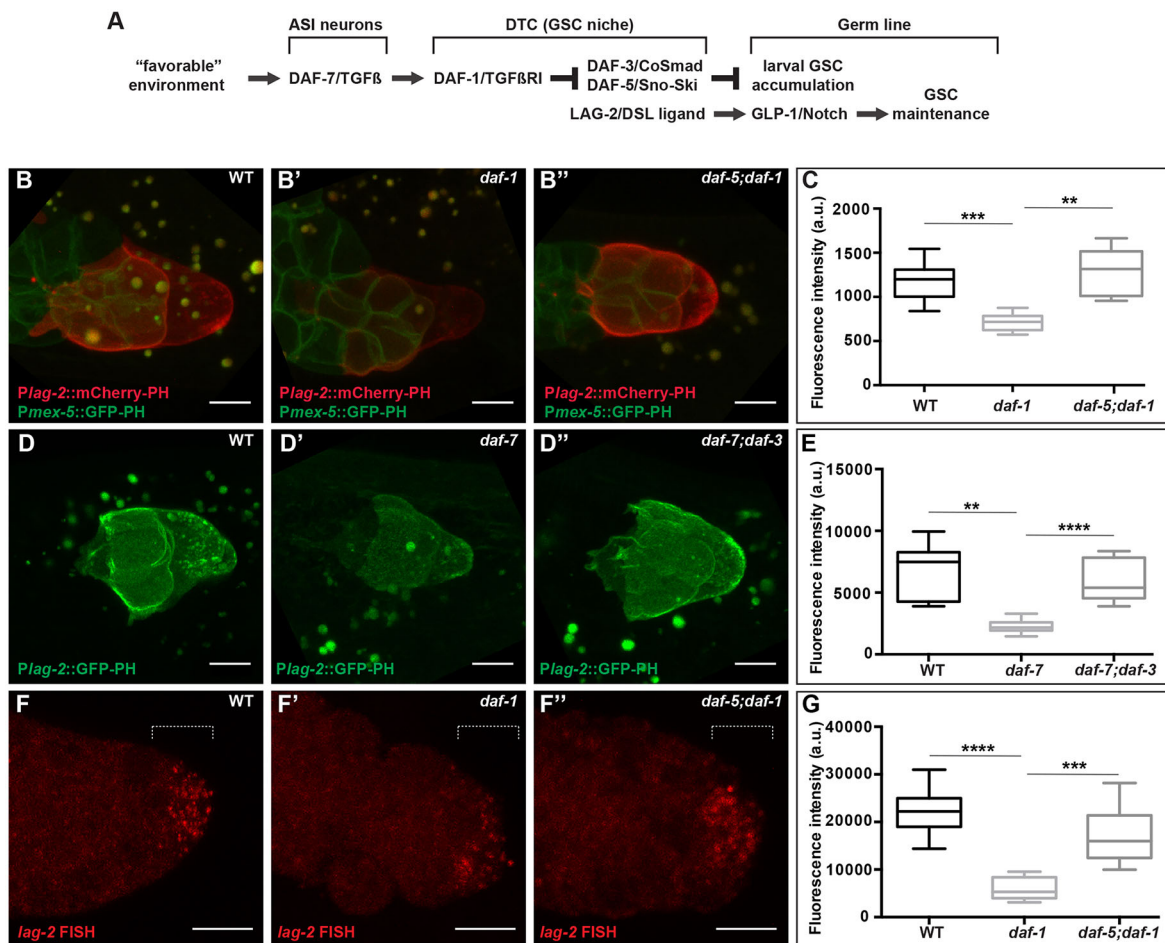

**Fig. 1. DAF-7/TGF $\beta$  signaling promotes *lag-2* expression in the DTC.** (A) Summary of the influences of larval DAF-7/TGF $\beta$  and GLP-1/Notch signaling reported prior to this work. (B–E) Expression of *lag-2* (3 kb upstream) reporters. *naIs37*: membrane-bound mCherry (mCherry-PH) low-copy reporter in the distal gonad arm of (B) wild-type, (B') *daf-1* and (B'') *daf-5; daf-1* animals. *naSi1* [*Pmex-5::GFP-PH*] marks germ cell membranes. See Fig. S1 for additional genotypes. *naSi8*: membrane-bound GFP (GFP-PH) single-copy reporter in (D) wild-type, (D') *daf-7* and (D'') *daf-7; daf-3* animals. (C, E) Quantification of mCherry and GFP signals, respectively. (F–G) *In situ* hybridization with *lag-2* probes of dissected gonads from (F) wild-type, (F') *daf-1* and (F'') *daf-5; daf-1* animals (magnified relative to other panels). (C, E, G) Values correspond to mean pixel intensity (C, E) and sum pixel intensity (G) in arbitrary units, measured in the DTC as described in the Materials and Methods. The boxes indicate the minimum–maximum range of samples quantified. Dotted lines mark the area (distal 5 μm) where the signal was quantified in G. This signal is in the DTC, not in the germ line. Scale bars: 5 μm. Mutant alleles: *daf-1*(*m40*), *daf-5*(*e1386*), *daf-7*(*e1372*) and *daf-3*(*e1376*). \*\**P*<0.01, \*\*\**P*<0.001, \*\*\*\**P*<0.0001, two-tailed Student's *t*-test. *n*≥15 animals, one DTC scored per animal. Error bars represent s.e.m. In all cases, *P*>0.05 for wild type versus double mutants.

proliferative germ cells, reduced the number of germ cells in the resulting germline tumors; and (2) our inability to detect consistent changes in then-existing *lag-2* reporter expression upon manipulation of the TGF $\beta$  pathway (Dalfó et al., 2012; E.J.A.H., unpublished). Although the residual effects of TGF $\beta$  signaling in the *glp-1*(null) mutant (albeit tumorous) background still argue for a partially GLP-1-independent role for TGF $\beta$  signaling (see Discussion), results presented here suggest that TGF $\beta$  signaling also influences GLP-1 activity by modulating expression of a DSL ligand, LAG-2, in the DTC.

Given our provisional conclusion that GLP-1/Notch was not acting downstream of TGF $\beta$ , we set out to investigate the possibility that the DTC-germline interface might be disrupted when TGF $\beta$  signaling was low. We built DTC-membrane-bound reporters (using GFP or mCherry fusions to the PH domain of the rat PLC1 $\delta$ 1) driven by the 3 kb *lag-2* upstream region used by others (Henderson et al., 1994). We introduced the new reporter transgenes into the worm genome using microparticle bombardment, a technique that results in fewer copies than traditional transgenes borne on

extrachromosomal arrays. We examined the DTC in the fourth larval stage (L4) as DAF-7/TGF $\beta$  signaling affects proliferative germ cell accumulation before and during this stage (Dalfó et al., 2012). We observed that the reporters were expressed at an overall lower level in wild type than reporters we had examined previously.

To our surprise, the new lower-copy reporters were expressed at significantly lower levels in *daf-7* or *daf-1* mutant backgrounds than in the wild type, and their expression was restored to wild-type levels in *daf-7* or *daf-1* double mutants with *daf-3* or *daf-5* (Fig. 1B,C, Fig. S1A–C). The restoration of expression in these double mutants is consistent with the logic of the canonical DAF-7/TGF $\beta$  pathway that we previously implicated in the regulation of the germline proliferative pool (Fig. 1A). Similar effects were observed with a single-copy reporter introduced by MosSCI (Fig. 1D,E) and with either mCherry or GFP reporters. A different non-*lag-2* DTC-expressed reporter showed no such regulation (Fig. S1D,E). Therefore, we conclude that the lower copy number and expression levels of the newer reporters reveals modulation by the DAF-7/TGF $\beta$  pathway that was not detectable with high-copy reporters.

To determine whether the reporters were reflecting changes in endogenous *lag-2* mRNA in the DTC, we performed fluorescence *in situ* hybridization experiments on dissected gonad preparations. Our results were consistent with the reporter analysis (Fig. 1F,G), suggesting that *lag-2* expression in the DTC is regulated positively by DAF-7/TGF $\beta$  signaling and negatively by DAF-3 and DAF-5.

### Environmental conditions alter *lag-2* expression, dependent on the DAF-7/TGF $\beta$ signaling pathway

Previously, we showed that DAF-7/TGF $\beta$  signaling regulates the accumulation of proliferative zone cells in the larval germ line in response to low food or high dauer pheromone, two conditions that reduce *daf-7* expression in ASI neurons (Ren et al., 1996; Schackwitz et al., 1996). To determine whether *lag-2* expression is similarly modulated, we measured GFP expression from a single-copy *lag-2* reporter under favorable (high food or low pheromone) and unfavorable (low food or high pheromone) conditions (Fig. 2). We found that *lag-2* reporter expression was diminished in either unfavorable condition relative to the favorable condition in the wild type (Fig. 2B,F). The *daf-7* mutant displayed lower expression that was not further reduced by unfavorable conditions (Fig. 2B',F'). In the *daf-7; daf-3* double mutant, *lag-2* reporter expression is restored to that of favorable conditions in the wild type, even under unfavorable conditions (Fig. 2B'',F''). These results suggest that environmental regulation of *lag-2* expression occurs through the canonical DAF-7/TGF $\beta$  pathway. Consistent with previous results (Dalfó et al., 2012), germ cell accumulation in all these environmental and genetic combinations parallels observed changes in *lag-2* reporter expression (Fig. 2).

### Canonical DAF-3 SMAD-binding sites in the *lag-2* promoter do not mediate DAF-7/TGF $\beta$ signaling in the DTC

We hypothesized that *lag-2* expression may be negatively regulated by the DAF-3 repressor complex through direct interaction with *lag-2* regulatory sequences. Within the 3 kb region upstream of *lag-2*, we found three instances of the 5 bp DAF-3 binding motif (Fig. 3A) previously defined in the *myo-2* promoter (Thatcher et al., 1999), and that are also present within a DAF-3-bound region in the promoters of *daf-7* and *daf-8*, as determined by whole-animal ChIP (Park et al., 2010). If these sites mediate DAF-3 repressor activity, mutating them should render *lag-2* expression insensitive to the loss of *daf-7* or *daf-1*. We generated two independent lines, one bearing a promoter with all three sites mutated that drives mCherry and the other bearing the wild-type promoter that drives GFP (Fig. 3A). We crossed them to generate a strain bearing both reporters and assessed their expression in the wild type and *daf-7* mutant. As expected, we observed lower wild-type promoter ('wt *lag-2* promoter', green in Fig. 3B) expression in the *daf-7* mutant background. However, we also observed lower expression from the mutant promoter in *daf-7* relative to wild type (Fig. 3B,C). The differences in mutant promoter-driven expression were also apparent in strains without the wild-type GFP reporter (data not shown). These results suggest that the predicted canonical DAF-3-binding sites do not confer regulation of *lag-2* expression by the DAF-7/TGF $\beta$  pathway in this context.

### An ~100 bp sequence upstream of *lag-2* is required for the response to DAF-7/TGF $\beta$ signaling

To identify the TGF $\beta$ -responsive region of the *lag-2* promoter, we performed promoter deletion analysis. We generated strains expressing reporters of 2.0, 1.0 and 0.5 kb upstream of the ATG. We then crossed the transgenes into *daf-7* and *daf-7; daf-3* mutant backgrounds and compared their expression (Fig. 4). Consistent

with previous reports of *lag-2* expression in head neurons (Ouellet et al., 2008; Singh et al., 2011), our 1.0 kb promoter drove reporter expression in head neurons, as well as in the DTC. This expression in neurons was not grossly affected by DAF-7/TGF $\beta$  pathway signaling and served as an internal control (Fig. S2). Each of the three promoter regions tested showed reduced expression in the *daf-7* single mutant that was restored to wild-type levels in *daf-7; daf-3* double mutants (Fig. 4A–F). We next assessed a promoter truncated at –405 bp. This reporter no longer responded to the loss of *daf-7*: expression was similar in wild type, *daf-7* and *daf-7; daf-3*. Taken together, these results define a key TGF $\beta$ -responsive element (TRE) near or within the –405 to –500 region upstream of *lag-2* (Fig. 4G,H).

### A 25 bp sequence mediates the *lag-2* promoter response to TGF $\beta$ signaling and the environment

Closer inspection of the TRE upstream of *lag-2* revealed homology to a *cis*-acting regulatory sequence named the PD motif, which was characterized in the *osm-9* promoter in the context of continuous versus postdauer (PD) development (Sims et al., 2016). The *osm-9* PD motif consists of two sequence elements: a DAF-3-binding site (*osm-9p*-DBS) and a conserved sequence (*osm-9p*-Cons) that is found in the upstream regulatory regions of ~1000 genes of the *C. elegans* genome (Sims et al., 2016). At the *lag-2* locus, we identified an 8 bp sequence with homology to the *osm-9* promoter that partially overlaps with the *osm-9p*-DBS at –577 to –570 upstream of the *lag-2* ATG (*lag-2p*-DBS). Whereas the *osm-9p*-DBS contains a canonical SMAD-binding sequence (GTCT), the *lag-2p*-DBS does not (Fig. S3). In addition, we identified a 25 bp loosely conserved sequence from –432 to –407 (*lag-2p*-Cons) that, although not identical to the *osm-9p*-Cons, satisfies much of the conserved (Cons) sequence 'rule' (Fig. S3). The *lag-2p*-DBS sequence is upstream of the TRE, and the *lag-2p*-Cons is within the TRE that we defined by promoter deletion analysis (Fig. 5A). We generated reporter strains with each site deleted individually or together in the context of the 1 kb *lag-2* upstream fragment (Fig. 5B–G). Expression of the reporter lacking the *lag-2p*-DBS sequence was still reduced in *daf-7* relative to wild type, albeit not as much as when the sequence was intact (Fig. 5B,C). By contrast, the reporter lacking the *lag-2p*-Cons motif was expressed at the same level in the wild type and in the *daf-7* mutant (Fig. 5D,E). These results indicate that the 25 bp *lag-2p*-Cons sequence is required for the TGF $\beta$  response in the L4 DTC.

To determine whether *lag-2* reporter expression in response to the environment (Fig. 2) is similarly regulated by the Cons sequence, we repeated the low-food experiment in strains bearing the 1 kb *lag-2* upstream fragment with and without the Cons sequence. We measured expression of GFP in the DTC of L4 animals raised on low or high bacterial concentration and, as a positive control for the effects of low food, measured the number of proliferative germ cells. We observed that in the absence of the Cons sequence, the reporter was no longer sensitive to the food level (Fig. S4), suggesting that the Cons sequence mediates the *daf-3*-dependent effect of low food on *lag-2* expression.

### DAF-3 binds upstream of *lag-2*

In the *osm-9* promoter, DAF-3 SMAD is enriched at the *osm-9p*-DBS within the PD motif to downregulate *osm-9* in ADL neurons of animals that passed through the dauer stage (Sims et al., 2016). To determine whether DAF-3 is enriched at the PD motif elements upstream of *lag-2*, we performed DAF-3 immunoprecipitation on whole worms using a commercially available antibody followed by quantitative PCR of the *lag-2* upstream sequences in the wild type



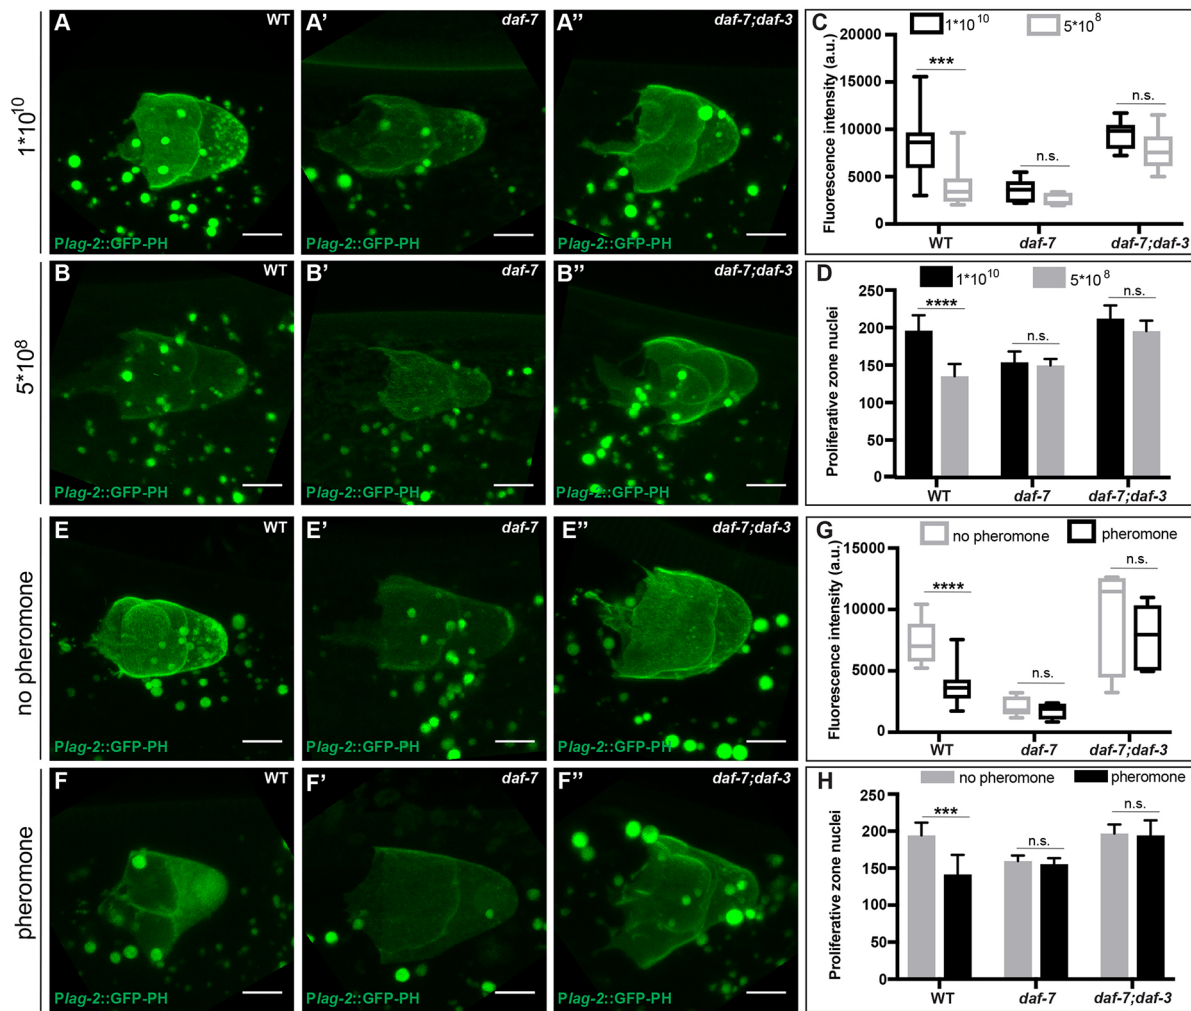

**Fig. 2. Reduced *lag-2* DTC expression under adverse environmental conditions depends on *daf-3*.** (A–F'') Expression levels of the *lag-2* single-copy reporter *naSi8* in the DTC of late L4 animals reared from early L3 on a high (1×10<sup>10</sup>) or low (5×10<sup>8</sup>) concentration of OP50 bacteria in (A,B) wild-type, (A',B') *daf-7* and (A'',B'') *daf-7;daf-3* animals. (C) Quantification of the GFP signal in the DTC in animals exposed to high or low bacterial concentrations. (D) Number of proliferative zone nuclei per gonad arm in early adults (collected from the same plates as in previous panels) reared from early L3 under high or low bacterial concentrations. (E–F'') Expression levels of *lag-2* single-copy reporter (*naSi8*) in the DTC of late L4 animals in the absence or presence of exogenous dauer pheromone introduced in the early L3 in (E,F) wild-type, (E',F') *daf-7* and (E'',F'') *daf-7;daf-3* animals. A slight enrichment of nuclear GFP was observed under high-pheromone conditions (but not under low-food conditions) in a majority of animals, but its significance was not further investigated. (G) Quantification of the GFP signal in the DTC in animals exposed or not exposed to exogenous dauer pheromone. (C,G) Mean pixel intensity (arbitrary units), measured in the DTC as described in the Materials and Methods. The boxes indicate the minimum-maximum range of samples quantified. (H) Number of proliferative zone nuclei of early adults (collected from the same plates as in previous panels) exposed or not exposed to exogenous dauer pheromone introduced in the early L3 stage. Scale bars: 5 μm. Mutant alleles were *daf-7*(e1372) and *daf-3*(e1376). n.s. indicates  $P > 0.05$ , \*\*\* $P < 0.001$ , \*\*\*\* $P < 0.0001$ , two-tailed Student's *t*-test.  $n \geq 15$  animals, one DTC scored per animal (GFP quantifications) or one gonadal arm per animal (proliferative zone quantifications). Error bars represent s.e.m. Additional statistical analysis in GFP quantifications:  $P > 0.05$  for the wild type under high-food or no pheromone conditions versus *daf-7;daf-3* double mutant under low-food or with pheromone conditions, respectively.

and the *daf-3*(*mgDf90*) mutant. Our results indicate that DAF-3 is significantly enriched at the *lag-2*p-DBS in wild-type L4 animals compared with background levels of enrichment in the *daf-3*(*mgDf90*) strain (Fig. 6A). As expected, DAF-3 was not enriched at the *osm-9*p-DBS in larval L4 animals that experienced continuous (non-dauer) development (Sims et al., 2016). Interestingly, we found that DAF-3 was enriched at the Cons sequences in both *lag-2* (*lag-2*p-Cons) and *osm-9* (*osm-9*p-Cons), suggesting that binding may occur at multiple sites within the PD motif (Fig. S5A). As positive controls, we verified DAF-3 enrichment at its characterized binding sites in the *myo-2*, *daf-7* and *daf-8* promoters (Park et al., 2010; Thatcher et al., 1999). Furthermore, DAF-3 was not enriched in the *lag-2*-coding region, similar to our negative control, *daf-14*

(Fig. S5A) (Park et al., 2010). Together, these results indicate that the *lag-2* upstream regulatory region contains the *lag-2*p-DBS and *lag-2*p-Cons sequence components of the PD motif, both of which have enriched DAF-3 binding in the ChIP assay.

#### One-hybrid studies support direct binding of DAF-3 to both PD motif elements within the *lag-2* upstream region

We sought independent evidence for binding of DAF-3 to the *lag-2* promoter. We turned to a bacterial one-hybrid approach that has advantages of high sensitivity and quantifiable results (Noyes, 2012). We found that the N-terminal DNA-binding region of DAF-3 showed greater binding in the presence of the 600 bp sequence upstream of the *lag-2* ATG (Fig. 6B, Fig. S5B). To assess

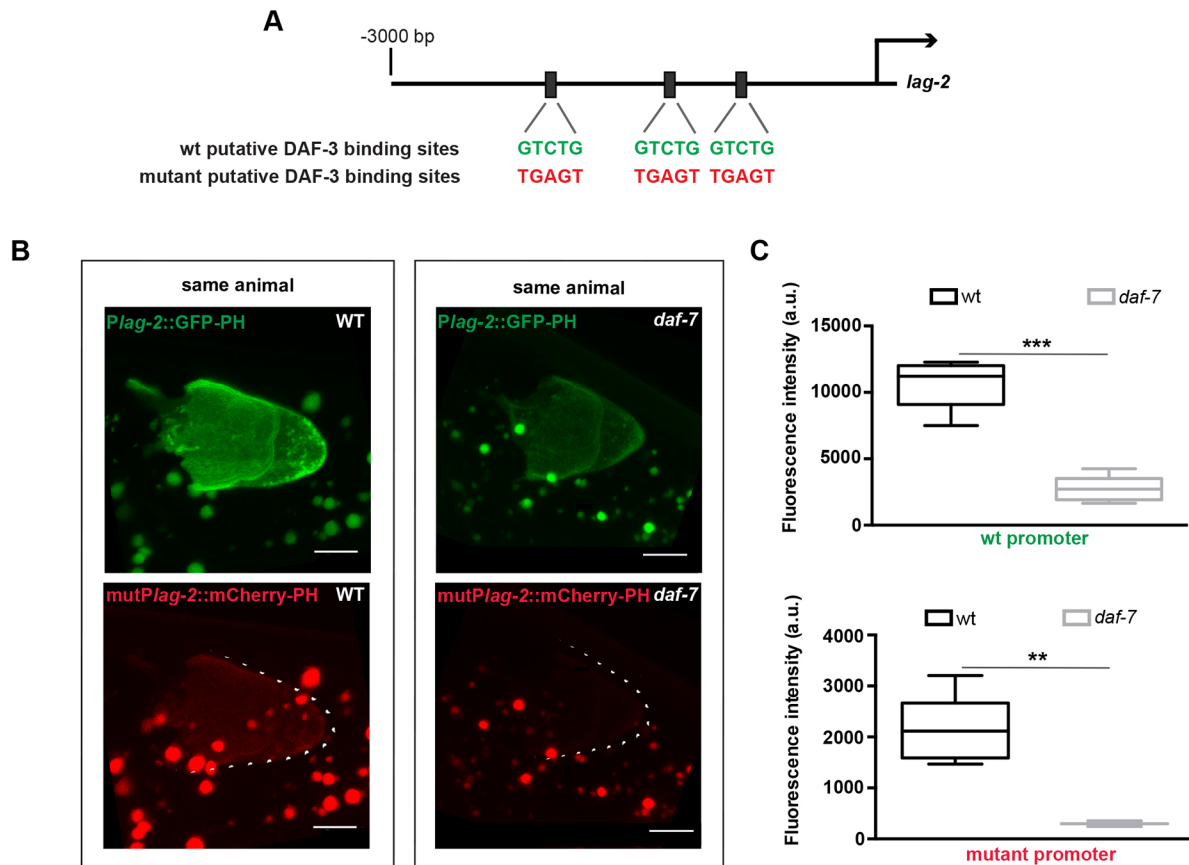

**Fig. 3. Canonical DAF-3-binding sites are not required for the effect of DAF-7/TGF $\beta$  on *lag-2* DTC expression.** (A) Positions of three canonical DAF-3-binding sites (Thatcher et al., 1999) within 3 kb upstream of the *lag-2* ATG. (B) Distal gonad arms from two animals, each expressing two reporters: the wild-type single-copy *naSi8* GFP-PH reporter; and *naIs96*, an integrated reporter in which mCherry-PH is driven by a *lag-2* promoter, in which three canonical DAF-3-binding sites were mutated as in A. The expression of each reporter was measured in individual wild-type (left) and *daf-7*(*e1372*) (right) animals. Scale bars: 5  $\mu$ m. (C) Quantification of GFP (top) and mCherry (bottom) in the DTC in the different genetic backgrounds. Mean pixel intensity (arbitrary units), measured in the DTC as described in the Materials and Methods. The boxes indicate the minimum-maximum range of samples quantified. \*\* $P < 0.01$ , \*\*\* $P < 0.001$ , two-tailed Student's *t*-test.  $n \geq 15$  animals, one DTC scored per animal. Error bars represent s.e.m.

the relevance of the PD motif in this binding assay, we deleted or scrambled the *lag-2*p-DBS and *lag-2*p-Cons sequences individually and in tandem. We found that deleting either site lowered binding (Fig. 6B). Although scrambling only one sequence had no effect, scrambling both significantly reduced binding (Fig. S5B). We conclude that, although the Cons site alone is required to regulate DTC reporter expression, binding can occur at either site, consistent with the whole-worm ChIP-qPCR analysis.

## DISCUSSION

Our results indicate that the environment impacts the expression of a DSL ligand, *lag-2*, in the germline stem cell niche through TGF $\beta$  signaling. When conditions are poor (low food or high pheromone), *lag-2* reporter expression is reduced, and this reduction is dependent on DAF-3 SMAD activity. Furthermore, this reduction is dependent on a 25 bp conserved (Cons) region of the *lag-2* promoter (Fig. S4). Together with our previous studies (Dalfó et al., 2012), this work suggests a simple working model (Fig. 7) in which proliferative germ cells accumulate in favorable conditions in response to DAF-7/TGF $\beta$  signaling that ensures high levels of LAG-2 in the DTC, that then signals to GLP-1/Notch in the germ line. That DAF-7/TGF $\beta$  signaling may modulate Notch activity is consistent with previous results showing that low *daf-1* activity enhances the phenotype of a *glp-1* reduction-of-function mutant and that, similar

to *glp-1*, *daf-1* does not affect the mitotic index of the proliferative pool (Dalfó et al., 2012).

Our current results show that DAF-3 SMAD can bind both the DBS and the Cons sequences in the *lag-2* promoter in the L4 (in whole-worm ChIP), even when conditions are favorable and animals have experienced continuous development. Work by others has shown that DAF-3 can also bind to *mdl-1*, *daf-7* and *daf-8* promoters in non-dauer animals (Deplancke et al., 2006; Park et al., 2010), and Sims et al. (2016) demonstrated that DAF-3 bound the *osm-9* promoter in continuously developing adult animals, which was dependent upon functional ZFP-1/AF10 protein and endogenous RNAi pathways. Spacing may also be important for DAF-3 binding of DBS and Cons, as binding in the bacterial one-hybrid assay was maintained when the sites were individually scrambled (rather than deleted) but was lost when both were scrambled (Fig. S5B). Subcellular localization of DAF-3 is not grossly altered by changes in TGF $\beta$  signaling (Patterson et al., 1997). Thus, DAF-3 activity as a transcriptional repressor may not correlate solely with its ability to bind DNA. For example, it could depend on post-translational modifications or additional DNA-binding partners. In unfavorable conditions when TGF $\beta$  receptor signaling is low, we speculate that the DAF-3 repressor complex at the Cons sequence becomes active in the DTC (Fig. 7).

How does the DAF-3 repressor complex repress transcription? Among many possible mechanisms, the active repressor complex

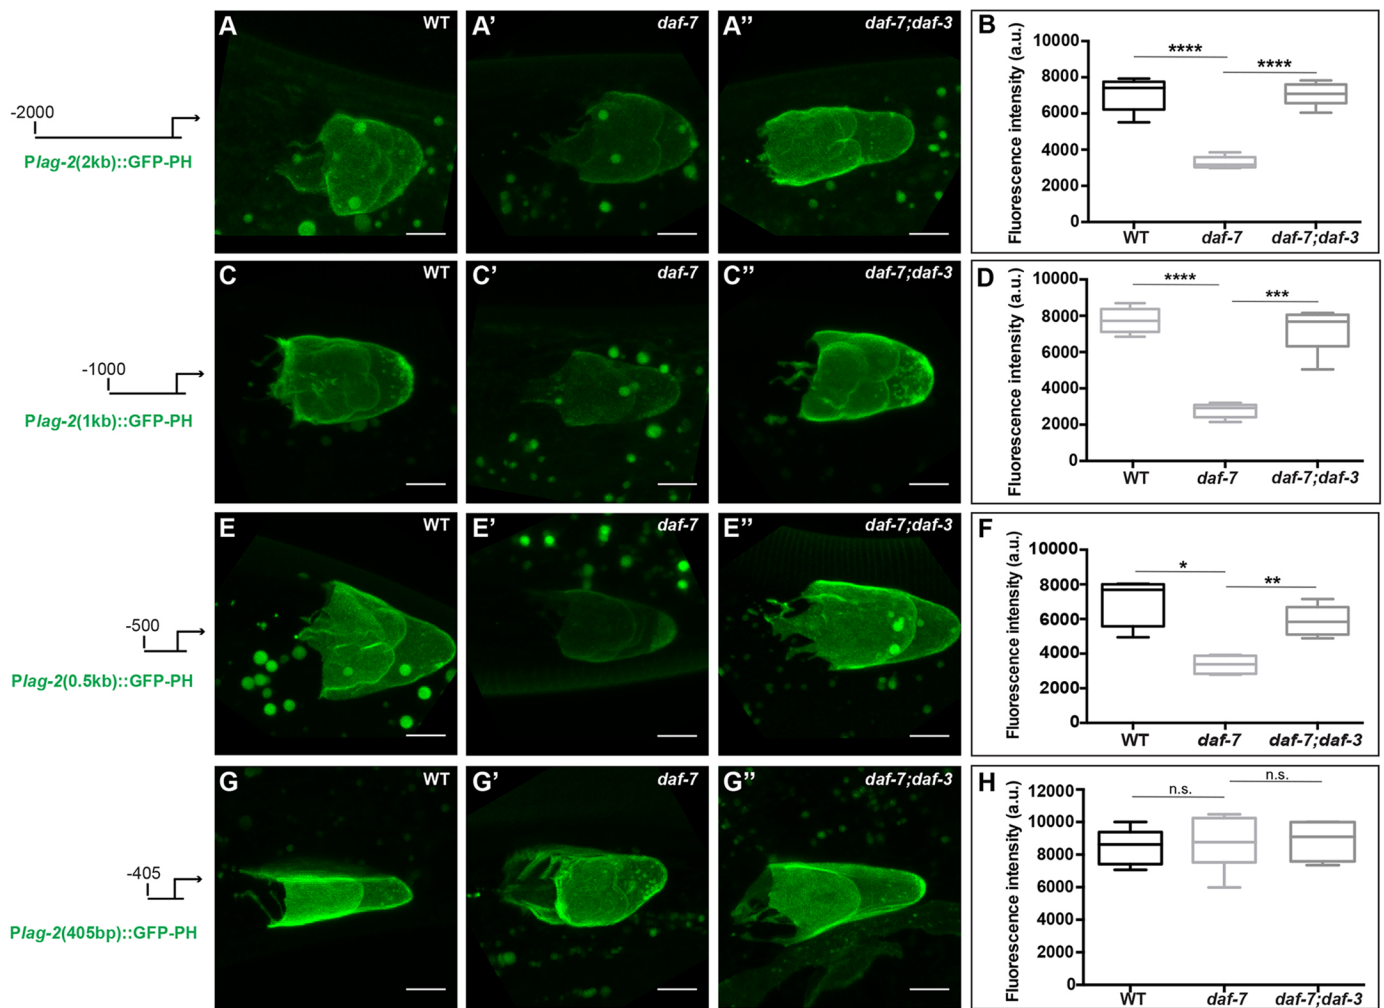

**Fig. 4. A region between –500 bp and –405 bp in the *lag-2* promoter is crucial for the DTC response to DAF-7/TGF $\beta$ .** Expression levels of *lag-2* low-copy GFP-PH reporters driven by (A–D) 2 kb, (C–D) 1 kb, (E–F) 500 bp and (G–H) 405 bp upstream in the DTC of wild-type, *daf-7*(e1372) and *daf-7*(e1372); *daf-3*(e1376) animals. Transgene alleles are *nals81*, *nals84*, *nals87* and *nals98*, respectively. (B,D,F,H) Mean pixel intensity (arbitrary units), measured in the DTC as described in the Materials and Methods. The boxes indicate the minimum-maximum range of samples quantified. Scale bars: 5  $\mu$ m. n.s. indicates  $P > 0.05$ , \* $P < 0.05$ , \*\* $P < 0.01$ , \*\*\* $P < 0.001$ , \*\*\*\* $P < 0.0001$ , two-tailed Student's *t*-test.  $n \geq 15$  animals, one DTC scored per animal. Error bars represent s.e.m. In all cases,  $P > 0.05$  for wild type versus double mutants.

may interfere with activators at nearby sites. The helix-loop-helix (HLH) transcription factor HLH-2/Da activates *lag-2* via enhancer box (E-box) sequences (Krause et al., 1997) that are close to the Cons sequence. However, we found that the active DAF-3 complex is unlikely to interfere with HLH-2, because depleting *hlh-2* by RNAi reduced *lag-2* reporter expression in wild-type, *daf-7* and *daf-7; daf-3* (Fig. S6 and supplementary Materials and Methods for RNAi methods). Interfering with *hlh-2* or E-boxes reduces but does not eliminate DTC *lag-2* expression, suggesting that other transcription factors contribute (Chesney et al., 2009; Karp, 2003; Karp and Greenwald, 2004). We found highly conserved sequences within 500 bp upstream of the ATG: a GC-box, a C/EBP box and an uncharacterized sequence (Fig. S7). Deletion of any one of these sites abrogated reporter expression (data not shown). Therefore, the DAF-3 repressor complex may interfere with activators that bind these sites.

If modulation of DTC *lag-2* expression and its subsequent effects on germline GLP-1/Notch receptor activity were the only mechanism by which the larval germ line responds to DAF-7/TGF $\beta$ , the germline progenitor pool should be insensitive to TGF $\beta$  in the absence of *glp-1*. However, we previously showed that fewer germline progenitor cells accumulate when DAF-7/TGF $\beta$  signaling

is low, even in the absence of the GLP-1/Notch receptor, albeit in a tumorous germline context (Dalfó et al., 2012). These results suggest a *glp-1*-independent role for TGF $\beta$ . One possibility is that the other Notch receptor in the *C. elegans* genome, LIN-12, has a partially redundant germline-autonomous role in maintaining germline stem cells. Null mutations in *lin-12* cause sterility, likely secondary to its roles in the somatic gonad (Greenwald et al., 1983; Seydoux et al., 1990), and no obvious larval germline *lin-12* expression is detected by *in situ* hybridization (NEXTDB; Shin-i and Kohara, 1999). We found that *lin-12* RNAi directed primarily to the germ line (in *rrf-1*; Sijen et al., 2001) did not impact the size of the proliferative pool in *glp-1*(+) or *glp-1*(*rf*), a highly sensitized background for germline stem cell loss (Fig. S8; see supplementary Materials and Methods for RNAi methods). Additional models include a Notch signaling-independent role for DTC *lag-2* or a *lag-2*-independent role for TGF $\beta$ . For example, TGF $\beta$  signaling may influence DTC-germline gap junctions that promote proliferation (Starich et al., 2014). Unlike the well-characterized role for TGF $\beta$  in the non-tumorous scenario, it is unknown whether the *glp-1*-independent effect of TGF $\beta$  on tumor cell number is DTC autonomous or *daf-3* dependent. In any case,



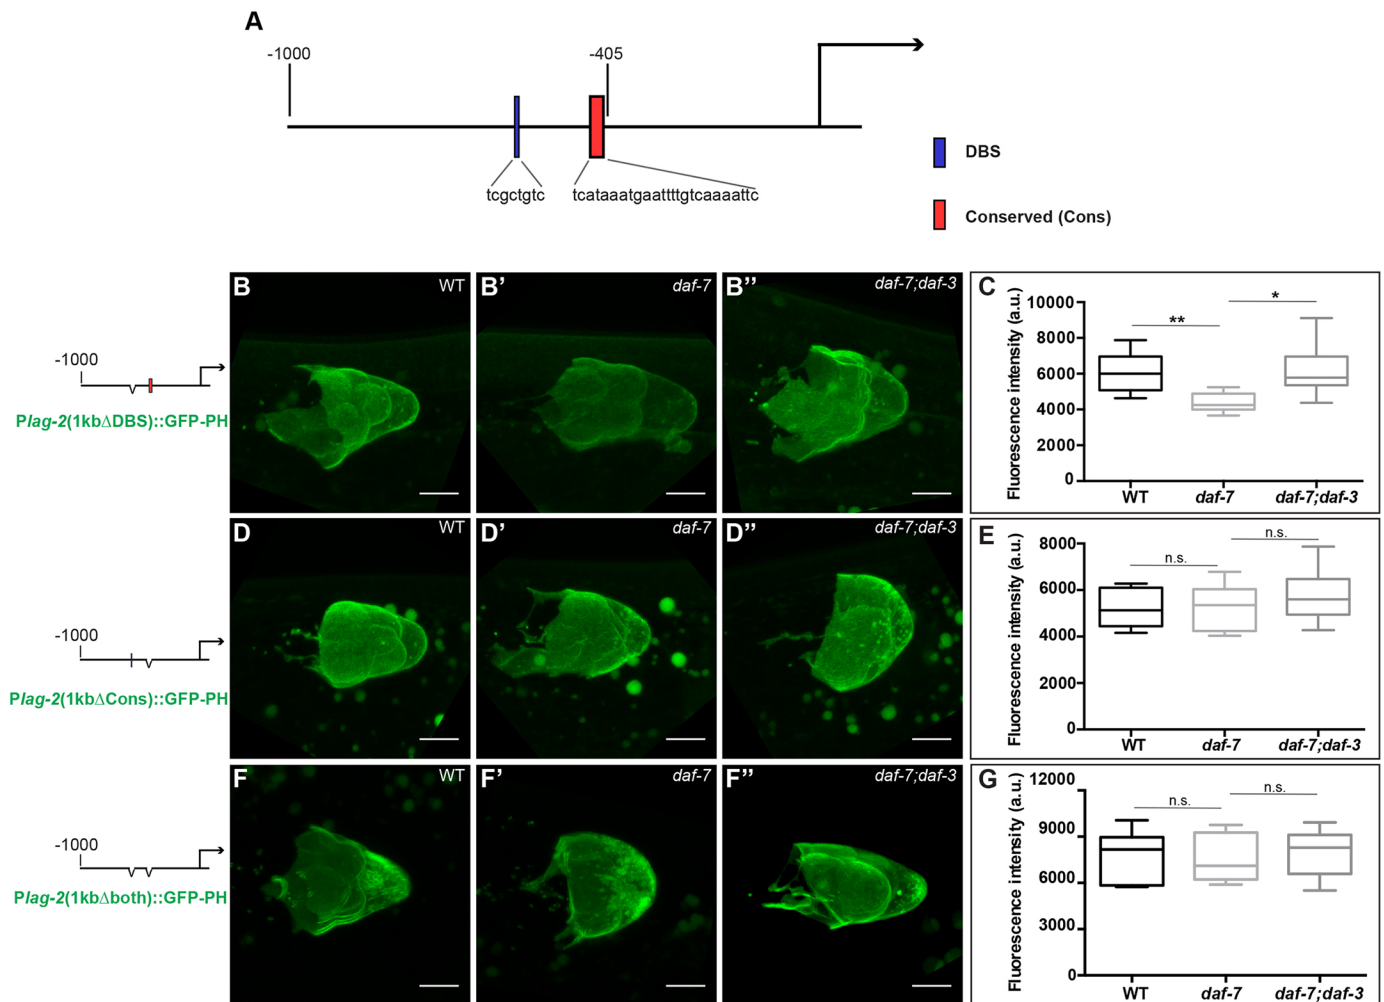

**Fig. 5. The conserved (Cons) sequence is required for the response of *lag-2* to DAF-7/TGF $\beta$  signaling in the DTC.** (A) Positions of the DAF-3-binding site (DBS) and conserved (Cons) sequences. (B-G) Expression of *lag-2* (1 kb, low-copy) GFP-PH reporters in the DTC of wild-type, *daf-7(e1372)* and *daf-7(e1372); daf-3(e1376)* animals. Reporters are lacking (B-C) DBS sequence (1kb $\Delta$ DBS), *nals100*; (D-E) conserved (Cons) sequence (1kb $\Delta$ Cons), *nals102*; or both (1kb $\Delta$ both, F-G), *nals106*. (C,E,G) Quantification of GFP expression; mean pixel intensity (arbitrary units), measured in the DTC as described in Materials and Methods. The boxes indicate the minimum-maximum range of samples quantified. Scale bars: 5  $\mu$ m. n.s. indicates  $P > 0.05$ , \* $P < 0.05$ , \*\* $P < 0.01$ , two-tailed Student's *t*-test.  $n \geq 15$  animals, one DTC scored per animal. Error bars represent s.e.m. In all cases,  $P > 0.05$  for wild type versus double mutants.

we propose that TGF $\beta$  regulation of DTC *lag-2* expression reported here accounts for much of the germ cell fate regulation by TGF $\beta$  in the presence of *glp-1*.

In apparent conflict with our results, and as noted by Dalfó et al., (2012), Park et al. (2010) reported that *daf-8*/R-Smad negatively regulates *lag-2* high-copy reporter expression in the DTC and germline proliferative zone size, independently of *daf-3*. Dalfó et al. (2012) observed positive regulation (i.e. less accumulation of proliferative germ cells in *daf-7*, *daf-1*, *daf-8* and *daf-14* mutants), dependent on *daf-3* and *daf-5*. Here, consistent with Dalfó et al., (2012) we show that DAF-7/TGF $\beta$  signaling promotes late larval *lag-2* expression and proliferative germ cell accumulation in a *daf-3*- and *daf-5*-dependent manner. A major difference in the two studies is that Park et al. (2010) focused on adults, whereas we focused on synchronized late larval stages. It remains possible that DAF-8 plays opposite roles in DTC *lag-2* regulation at different life stages. We also observed that the DBS and Cons sites may mediate activation (rather than repression) of a *lag-2* reporter in neurons, indicating cell-specific regulatory differences (data not shown). Consistent with Park et al. (2010), we found enrichment of DAF-3 at the *daf-7* and *daf-8* promoters using whole-worm ChIP (Fig. S5A). A more

complete understanding awaits additional comparative studies of all pathway components in specific cell types at different stages in tightly synchronized animals reared in well-controlled environments.

### TGF $\beta$ -mediated regulation of DSL ligands and Notch signaling in other systems

Examples of DSL ligand regulation by TGF $\beta$  superfamily members exist in several systems. This may reflect an ancient relationship between these signaling pathways that, together with Wnt, existed in the earliest metazoans (Richards and Degnan, 2010). Examples of positive regulation include TGF $\beta$  promoting Jag1 expression or activity in the epithelial-to-mesenchymal transition in mammalian cell lines (Zavadil et al., 2004), muscle differentiation of mesenchymal stem cells (Kurpinski et al., 2010), and an endothelial-to-hematopoietic transition in zebrafish (Monteiro et al., 2016). Positive regulation also occurs in endothelial cell lines where a Smad1/5-binding motif was identified upstream of *Jag1* by ChIP-seq (Morikawa et al., 2011). Nodal also positively regulates *Ci-Delta2* transcription in notochord specification in *Ciona* (Hudson and Yasuo, 2005, 2006). It will be of interest to

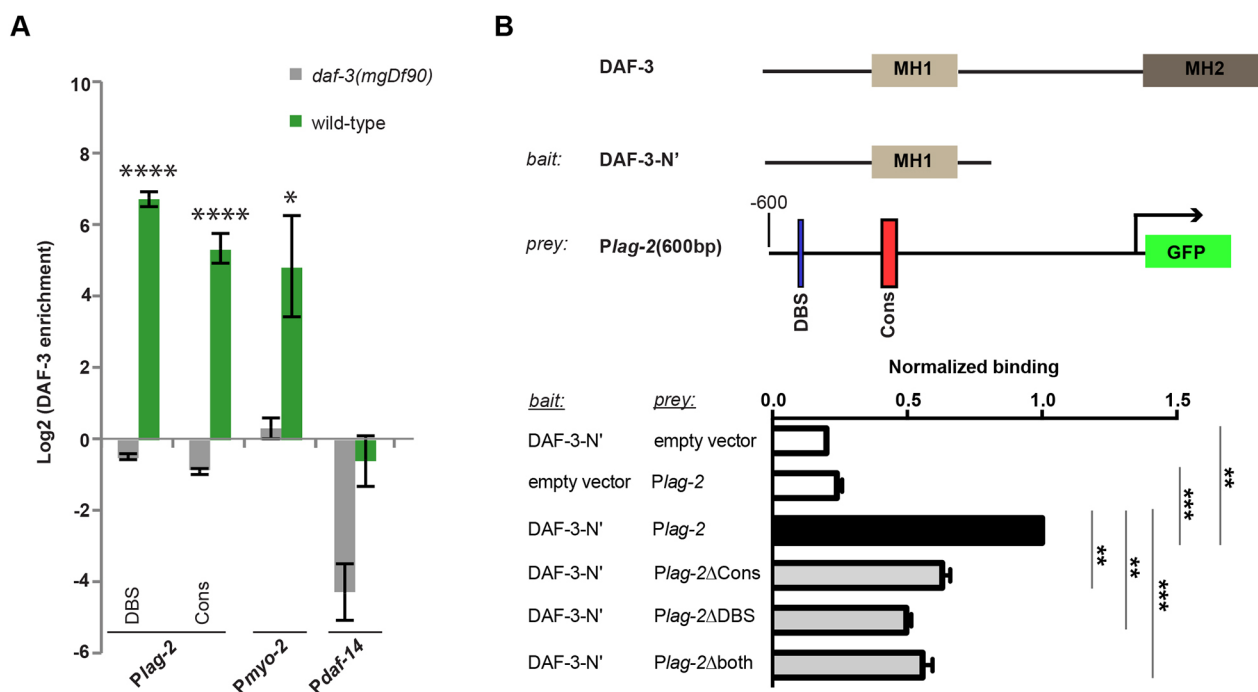

**Fig. 6. DAF-3 can bind the *lag-2* promoter.** (A) Log2 normalized enrichment of DAF-3 SMAD binding to *lag-2* DBS and conserved (Cons) elements in the wild type and in *daf-3(mgDf90)* mutants. Upstream regulatory regions of *myo-2* and *daf-14* serve as positive and negative controls, respectively. Bar graph represents IP-qPCR data, normalized to DAF-3 enrichment at the actin *act-2* promoter (Park et al., 2010).  $n \geq 2$  biologically independent trials. Significant enrichment in wild type relative to *daf-3(mgDf90)* is indicated by \* $P < 0.05$ , \*\*\*\* $P < 0.0001$ , two-tailed Student's *t*-test. Data are mean  $\pm$  s.e.m. (B) Bacterial one-hybrid assay. The DAF-3 N-terminal fragment (up to amino acid 250; DAF-3-N') was used as bait and 600 bp upstream of the *lag-2* ATG [*P<sub>lag-2</sub>*(600 bp)] was used as prey. Bar graph represents FACS analysis data (mean GFP fluorescence) of different baits and preys, normalized to the signal from DAF-3-N' and *P<sub>lag-2</sub>*. Empty prey and bait vectors served as negative controls. Binding of DAF-3-N' to 600 bp of the *lag-2* promoter lacking Cons (*P<sub>lag-2</sub>* $\Delta$ Cons), DBS (*P<sub>lag-2</sub>* $\Delta$ DBS) or both (*P<sub>lag-2</sub>* $\Delta$ both). \*\* $P < 0.01$ , \*\*\* $P < 0.001$ , two-tailed Student's *t*-test. Data are mean  $\pm$  s.e.m.

determine how positive regulation by TGF $\beta$  occurs through *cis*-acting sequences upstream of DSL ligand genes *in vivo* in other systems.

## Environmental regulation of Notch signaling

Examples of environmental regulation of canonical Notch signaling in response to DSL ligand activity are emerging. In *C. elegans*, LAG-2 is expressed in many different cell types and stages. Expression of *lag-2* in IL2 neurons is dauer specific. This regulation depends on putative forkhead-binding sites 1.3 kb upstream of the start site (Ouellet et al., 2008). In the background of *daf-7* mutants that form dauers constitutively but are still sensitive to dauer recovery cues, Ouellet et al. (2008) found that loss of *lag-2* or *glp-1*, or ablation of IL2, interfered with dauer maintenance. In light of our results, it will be interesting to determine whether the sequences implicated in *lag-2* regulation in the DTC also mediate DAF-3 repression of *lag-2* expression in specific neurons that regulate dauer entry, maintenance and recovery. It is noteworthy that the Cons-binding site we define as crucial for modulation of *lag-2* in the DTC was discovered for its role in the regulation of *osm-9* in postdauer ADL neurons via DAF-3 binding (Sims et al., 2016).

The dauer decision also impacts *lag-2* expression in the context of vulval precursor cell (VPC) fate specification. Here, the DAF-2 pathway, rather than the TGF $\beta$  pathway, transduces environmental signals via inhibition of DAF-16 that acts autonomously to prevent *lag-2* expression in P6.p during dauer and thereby forestalls fate specification (Karp and Greenwald, 2013). Regulation of a 1 kb *lag-2* reporter in VPCs (but not in the DTC or in neurons) is also sensitive to *pha-4* RNAi (Chen and Riddle, 2008). Because PHA-4 FOXA acts in both transcriptional regulation and environmental signaling, this regulation may also contribute to the *lag-2* response to environmental cues. It will be interesting to determine whether other (non-LAG-2) DSL ligands in *C. elegans* in other cellular contexts are regulated by the environment.

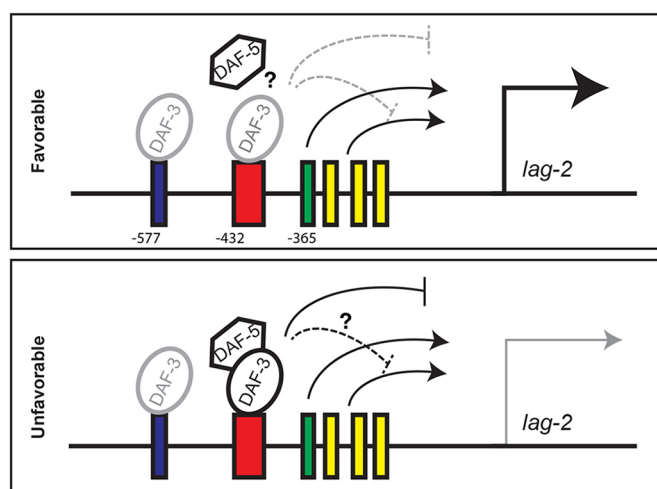

**Fig. 7. A working model for the regulation of late larval DTC-expressed *lag-2*.** (Top) Under favorable conditions, DAF-7/TGF $\beta$  pathway activity inhibits repressor activity of the DAF-3/DAF-5 complex, possibly by interfering with complex formation or stability. *lag-2* expression is driven by positive regulators, including HLH-2, which binds the E-box (green), and unknown regulators that bind other conserved sequences (yellow) shown in Fig. S7. DAF-3 may bind both the DBS (blue) and the Cons (red) sequences under favorable conditions, but it is not active. (Bottom) Under unfavorable conditions, the DAF-3/DAF-5 complex is active and represses *lag-2* expression, possibly by interfering with non-HLH-2 activators. See Discussion for details.



In *Drosophila*, regulation of Notch signaling by the environment or physiology has been documented in at least two contexts: the ovary and the adult brain. In the ovary, Notch activity is required to maintain somatic cap cells that, in turn, maintain germline stem cells (GSCs) (Song et al., 2007). Under poor nutrient conditions, low insulin signaling allows FOXO to promote expression of the glycosyltransferase Fringe, which, in turn, negatively regulates Notch receptor activity. Insulin signaling in this context also acts in a Notch-independent manner to promote adhesion between the cap cells and the GSCs (Hsu and Drummond-Barbosa, 2009, 2011; Yang et al., 2013). Delta-dependent modulation of Notch activity in the adult *Drosophila* brain occurs in response to several stimuli, including odorants (Lieber et al., 2011), ultimately contributing to changes in the volume of glomeruli and in activity of specific neurons (Kidd and Lieber, 2016; Kidd et al., 2015).

It remains to be determined whether environmental or physiological regulation of Notch signaling is widespread among animals, whether it occurs primarily via modulation of ligand expression and whether direct regulation of ligand expression by TGF $\beta$  is a common mechanism. Environmental regulation of Notch signaling could conceivably contribute to disease states such as developmental defects and cancer, in which aberrant Notch signaling has been implicated (Aster, 2014). Modulation of Notch signaling by the environment or animal physiology may have fewer consequences in relatively fast or highly robust Notch-mediated cell fate decisions. It may be more consequential in circumstances where Notch activity is required over time (e.g. maintenance of developmental states such as dauer, maintenance of stem cells or response to long-term olfactory cues) or in relatively plastic developmental or physiological processes that are important for survival or reproduction and could thereby confer evolutionary advantage.

## MATERIALS AND METHODS

### Strains and plasmids

Strains were derived from N2 wild type (Bristol) and handled using standard methods (Brenner, 1974). Synchronization was performed by 2 h hatch-off as described previously (Pepper et al., 2003). Unless otherwise indicated, worms were grown on OP50 at 20°C. Transgene alleles are noted in figure legends; corresponding plasmids are in Table S1, together with full genotypes of all strains. Plasmids generated for this study were: pGC457, pGC630, pGC642, pGC643, pGC644, pGC680, pGC681, pGC682, pGC683 and pGC684; see Table S1 for plasmid construction details and primer sequences. Transgenic strains were integrated by microparticle bombardment (Praitis et al., 2001) into DP38 *unc-119(ed3)*, except for MosSCI-generated *naSi8* (Frøkjær-Jensen et al., 2008). To compare transgene expression in different mutant backgrounds, each transgene insertion was generated in an otherwise wild-type (non-TGF $\beta$ -pathway mutant) background and subsequently crossed into the different TGF $\beta$  pathway gene mutants.

### Microscopy and image analysis

For fluorescence images, live animals were immobilized with 0.2 mM levamisole in M9 on a 4% agarose pad and imaged at 63 $\times$ /1.20 objective on Leica SP5 confocal microscope. For each experiment, control and experimental animals (e.g. wild type, *daf-7* and *daf-7;daf-3*) were imaged in a single session. All microscope (e.g. laser power, gain, pin hole) and camera settings (e.g. exposure times) were established and held constant for imaging sessions for each transgene. Exposure times and gain were adjusted to insure sub-saturating levels. Approximately 25 images (z-stacks) were captured at intervals of 0.46  $\mu$ m, and were analyzed using ImageJ (<http://rsb.info.nih.gov/ij>). Figures show z-stacks as maximum intensity projections.

### Quantification of *lag-2* reporter expression

After summing the intensity for the entire projection, bandpass filtering and thresholding were performed to help distinguish between DTC and gut

granule signals. The ‘analyze particles’ function was applied and mean pixel intensity was measured in all particles that were manually designated as DTC (i.e. omitting gut granule signals that appear as large bright spots in some figure panels, depending on the orientation of the animal). At least 15 animals were analyzed per genotype.

### Quantification of *lag-2* *in situ* hybridization

The ImageJ ‘object counter 3D’ plug-in was used. The threshold was set such that pixel intensity was measured only from the *in situ* signal, and the pixel intensity from all the detected dots in all stacks in each image was summed. At least 15 animals were analyzed per genotype.

### Germ nuclei counts

Whole-worm fixation, staining, microscopy and proliferative zone determination were performed according to Michaelson et al. (2010). Germ nuclei counts used a semi-automated ImageJ plug-in described previously (Korta et al. 2012).

### *In situ* hybridization

Custom Stellaris fluorescent *in situ* hybridization probes were designed against the cDNA of *lag-2* using the Stellaris FISH Probe Designer (<https://www.biosearchtech.com/support/tools/design-software/stellaris-probe-designer>) and 48 probes labeled with Quasar 670 were obtained from Biosearch Technologies. L4 animals were dissected and subjected to a procedure similar to Biosearch recommendations and to that described by Lee et al. (2016) with modifications as follows: after washing twice with M9 buffer, gonads were fixed (3.7% formaldehyde in 1 $\times$ PBS RNase free) for 45 min at room temperature. Following two washes with 1 $\times$ PBS, gonads were resuspended in 70% ethanol for 30 min. Following ethanol removal, samples were washed in wash buffer (2 $\times$ SSC, 10% deionized formamide) for 5 min. After wash buffer removal, samples were placed in hybridization buffer (228 mM dextran sulfate, 2 $\times$ SSC, 10% deionized formamide) mixed with *lag-2* probe at 0.25  $\mu$ M final concentration at 37°C overnight in the dark. After hybridization solution removal, samples were washed with wash buffer for 30 min at 37°C in the dark. Samples were then washed in 2 $\times$ SSC. Following 2 $\times$ SSC removal, samples were mounted using Antifade Prolong Gold mounting medium (Life Technologies). All solutions were made with nuclease-free water.

### Bacterial reduction and dauer pheromone assays

Both pheromone and food (OP50) assays were performed as described by Dalfó et al. (2012). Synchronized early L3 worms were washed and distributed on plates at 25°C and analyzed in the L4 for *lag-2* DTC expression and as early adults for number of nuclei in the proliferative zone. Pairs of conditions (high/low food and with/without pheromone) were carried out in parallel in at least three independent experiments and, in each case, L4 and adult animals were taken from the same plates to ensure they experienced the same conditions. Bacterial concentrations were established by serial dilutions as described previously (Korta et al., 2012). Dauer pheromone preparation was carried out as described previously (Zhang et al., 2013). In this case, 66  $\mu$ l of crude pheromone was added to 1 ml of NGM agar, the amount that caused 100% of animals to enter dauer in a wild-type population at 25°C.

### Chromatin immunoprecipitation

DAF-3 chromatin immunoprecipitation (ChIP) was performed as described previously (Sims et al., 2016) using Novus Biologicals NB100-1924 Lot A1, and packed worm pellets (~500  $\mu$ l) of N2 L4 larvae. The negative control, which is particularly important for this potentially cross-reactive antibody, was a packed pellet (~500  $\mu$ l) of mixed population GR1311 *daf-3(mgDf90)*.

### Real-time PCR

Quantitative real-time PCR was carried out using 1  $\mu$ l of the DAF-3 ChIP using the iTaq Universal SYBR Green Supermix (BioRad). Primers used were: MO2389 and MO2390 for the region in the *lag-2* promoter homologous to an *osm-9* promoter region with a potential DAF-3 binding site (DBS); MO2391 and MO2388 for the conserved PD motif in the *lag-2* promoter; MO2339 and MO2340 for the DBS in the *osm-9* promoter;

MO2392 and MO2393 for the conserved sequence in the PD motif in the *osm-9* promoter; MO2262 and MO2263 for detection of the C sub-element in the *myo-2* promoter; MO2398 and MO2399 for a region in exon 1 of *lag-2*; and MO2402 and MO2403 for a region in exon 3 of *lag-2* (see Table S1). Regions in the promoters of *daf-7* and *daf-8* were used as positive controls and *daf-14* as a negative control (Park et al., 2010).  $C_t$  values were normalized using *act-2* (Park et al., 2010).

### Bacterial one-hybrid assay

Mutant and wild-type versions the *lag-2* upstream sequence (600 bp) were cloned into MRB1H-reporter vector (also known as ‘GHUC’, see Table S1) (Oakes et al., 2016) between *NotI* and *EcoRI* upstream of the HIS3-GFP cassette, generating GHUC-1, GHUC-2, GHUC-3, GHUC-4, GHUC-5, GHUC-6 and GHUC-7. DNA encoding amino acids 1–250 of DAF-3 (DAF-3-N’) was cloned into the pB1Hw2-omega vector (Noyes et al., 2008) between *KpnI* and *XbaI*, creating an omega-DAF-3-N’ fusion in pB1Hw2-Daf3250 (see Table S1). Combinations of the DAF-3-N’ pB1Hw2-omega vector or pB1Hw2-Daf3250 (bait) and *lag-2* promoter MRB1H-reporter vectors or GHUC-1 to GHUC-7 (prey) were transformed into USO  $\Delta$ omega cells (Noyes et al., 2008) and selected on Kan/Amp to recover cells with both plasmids. Three replicate colonies from each bait-prey combination were inoculated into 5 ml rich media with Kan/Amp, and incubated at 37°C for ~8 h (OD<sub>600</sub>=0.5). From each culture, 2.5  $\mu$ l was used to inoculate 5 ml supplemented minimal NM media containing histidine, uracil, IPTG, Kan/Amp (Noyes et al., 2008) and grown at 37°C overnight (OD<sub>600</sub>~1.0–2.0). On ice, 1 ml from each sample was pelleted, washed once with PBS and re-pelleted. PBS was removed and the pellet resuspended in 1 ml PBS+1% FBS. Resuspended cells (100  $\mu$ l) were added to 1.5 ml PBS+1% FBS in a FACS tube. The mean GFP fluorescence of *lag-2* mutant samples and controls and *lag-2* scrambled samples and controls were measured with a Sony SH800 cell sorter and a BD LSRII HTS sorter, respectively. Mean fluorescence values were determined from at least 10,000 cells. Sequences for scrambled *lag-2* DBS and Cons sequences were: 5’-ctatcact-3’ and 5’-ctcggggcaggccctcgggcct-3’, respectively.

### Acknowledgements

We thank Yossi Capua and Jesus Martinez-Gomez for technical assistance, Chris Rushlow for advice, and members of the Nance and Hubbard labs for advice, discussions and comments on the manuscript. Some strains were provided by the CGC, which is funded by NIH Office of Research Infrastructure Programs (P40 OD010440). We also thank WormBase and the NYU School of Medicine’s Microscopy Core, which is partially supported by a Cancer Center Support Grant (P30CA016087), for the use of confocal microscope, which is partially supported by NCRS S10 RR024708.

### Competing interests

The authors declare no competing or financial interests.

### Author contributions

Conceptualization: O.P., M.B.N., S.E.H., E.J.A.H.; Methodology: O.P., M.B.N., S.E.H., E.J.A.H.; Validation: O.P., M.C.O., M.B.N., S.E.H., E.J.A.H.; Formal analysis: O.P., M.C.O., M.B.N., S.E.H., E.J.A.H.; Investigation: O.P., M.C.O., K.Y.H.; Resources: O.P., M.C.O., M.B.N., S.E.H., E.J.A.H.; Data curation: O.P., M.B.N., S.E.H., E.J.A.H.; Writing - original draft: O.P., M.B.N., S.E.H., E.J.A.H.; Writing - review & editing: O.P., M.C.O., M.B.N., S.E.H., E.J.A.H.; Visualization: O.P., M.C.O., S.E.H.; Supervision: M.B.N., S.E.H., E.J.A.H.; Project administration: M.B.N., S.E.H., E.J.A.H.; Funding acquisition: E.J.A.H., S.E.H.

### Funding

This work was supported by the National Institutes of Health (R01GM102254 and R01GM061706 to E.J.A.H.; R15GM111094 to S.E.H.). Deposited in PMC for release after 12 months.

### Supplementary information

Supplementary information available online at <http://dev.biologists.org/lookup/doi/10.1242/dev.147660.supplemental>

### References

- Aster, J. C. (2014). In brief: Notch signalling in health and disease. *J. Pathol.* **232**, 1–3.
- Austin, J. and Kimble, J. (1987). glp-1 is required in the germ line for regulation of the decision between mitosis and meiosis in *C. elegans*. *Cell* **51**, 589–599.
- Brenner, S. (1974). The genetics of *Caenorhabditis elegans*. *Genetics* **77**, 71–94.
- Chen, N. and Greenwald, I. (2004). The lateral signal for LIN-12/Notch in *C. elegans* vulval development comprises redundant secreted and transmembrane DSL proteins. *Dev. Cell* **6**, 183–192.
- Chen, D. and Riddle, D. L. (2008). Function of the PHA-4/FOXA transcription factor during *C. elegans* post-embryonic development. *BMC Dev. Biol.* **8**, 26.
- Chesney, M. A., Lam, N., Morgan, D. E., Phillips, B. T. and Kimble, J. (2009). *C. elegans* HLH-2/E/Daughterless controls key regulatory cells during gonadogenesis. *Dev. Biol.* **331**, 14–25.
- Dalfó, D., Michaelson, D. and Hubbard, E. J. A. (2012). Sensory regulation of the *C. elegans* germline through TGF- $\beta$ -dependent signaling in the niche. *Curr. Biol.* **22**, 712–719.
- Deplancke, B., Mukhopadhyay, A., Ao, W., Elewa, A. M., Grove, C. A., Martinez, N. J., Sequerra, R., Doucette-Stamm, L., Reece-Hoyes, J. S., Hope, I. A. et al. (2006). A gene-centered *C. elegans* protein-DNA interaction network. *Cell* **125**, 1193–1205.
- Drummond-Barbosa, D. (2008). Stem cells, their niches and the systemic environment: an aging network. *Genetics* **180**, 1787–1797.
- Frøkjær-Jensen, C., Wayne Davis, M., Hopkins, C. E., Newman, B. J., Thummel, J. M., Olesen, S.-P., Grunnet, M. and Jorgensen, E. M. (2008). Single-copy insertion of transgenes in *Caenorhabditis elegans*. *Nat. Genet.* **40**, 1375–1383.
- Greenwald, I. S., Sternberg, P. W. and Horvitz, H. R. (1983). The lin-12 locus specifies cell fates in *Caenorhabditis elegans*. *Cell* **34**, 435–444.
- Gummienny, T. L. (2013). TGF- $\beta$  signaling in *C. elegans*. In *WormBook* (ed. The *C. elegans* Research Community). WormBook, <http://www.wormbook.org>.
- Henderson, S. T., Gao, D., Lambie, E. J. and Kimble, J. (1994). lag-2 may encode a signaling ligand for the GLP-1 and LIN-12 receptors of *C. elegans*. *Development* **120**, 2913–2924.
- Hsu, H.-J. and Drummond-Barbosa, D. (2009). Insulin levels control female germline stem cell maintenance via the niche in *Drosophila*. *Proc. Natl Acad. Sci. USA* **106**, 1117–1121.
- Hsu, H.-J. and Drummond-Barbosa, D. (2011). Insulin signals control the competence of the *Drosophila* female germline stem cell niche to respond to Notch ligands. *Dev. Biol.* **350**, 290–300.
- Hubbard, E. J. A., Korta, D. Z. and Dalfó, D. (2012). Physiological control of germline development. In *Germ Cell Development in C. elegans*, pp. 101–131. New York, NY: Springer.
- Hudson, C. and Yasuo, H. (2005). Patterning across the ascidian neural plate by lateral Nodal signalling sources. *Development* **132**, 1199–1210.
- Hudson, C. and Yasuo, H. (2006). A signalling relay involving Nodal and Delta ligands acts during secondary notochord induction in *Ciona* embryos. *Development* **133**, 2855–2864.
- Karp, X. (2003). Post-transcriptional regulation of the E/Daughterless ortholog HLH-2, negative feedback, and birth order bias during the AC/VU decision in *C. elegans*. *Genes Dev.* **17**, 3100–3111.
- Karp, X. and Greenwald, I. (2004). Multiple roles for the E/Daughterless ortholog HLH-2 during *C. elegans* gonadogenesis. *Dev. Biol.* **272**, 460–469.
- Karp, X. and Greenwald, I. (2013). Control of cell-fate plasticity and maintenance of multipotency by DAF-16/FoxO in quiescent *Caenorhabditis elegans*. *Proc. Natl Acad. Sci. USA* **110**, 2181–2186.
- Kidd, S. and Lieber, T. (2016). Mechanism of Notch pathway activation and its role in the regulation of olfactory plasticity in *Drosophila melanogaster*. *PLoS ONE* **11**, e0151279.
- Kidd, S., Struhl, G. and Lieber, T. (2015). Notch is required in adult *Drosophila* sensory neurons for morphological and functional plasticity of the olfactory circuit. *PLoS Genet.* **11**, e1005244.
- Kimble, J. E. and White, J. G. (1981). On the control of germ cell development in *Caenorhabditis elegans*. *Dev. Biol.* **81**, 208–219.
- Korta, D. Z., Tuck, S. and Hubbard, E. J. A. (2012). S6K links cell fate, cell cycle and nutrient response in *C. elegans* germline stem/progenitor cells. *Development* **139**, 859–870.
- Krause, M., Park, M., Zhang, J. M., Yuan, J., Harfe, B., Xu, S. Q., Greenwald, I., Cole, M., Paterson, B. and Fire, A. (1997). A *C. elegans* E/Daughterless bHLH protein marks neuronal but not striated muscle development. *Development* **124**, 2179–2189.
- Kurpinski, K., Lam, H., Chu, J., Wang, A., Kim, A., Tsay, E., Agrawal, S., Schaffer, D. V. and Li, S. (2010). Transforming growth factor- $\beta$  and notch signaling mediate stem cell differentiation into smooth muscle cells. *Stem Cells* **28**, 734–742.
- Larsen, P. L., Albert, P. S. and Riddle, D. L. (1995). Genes that regulate both development and longevity in *Caenorhabditis elegans*. *Genetics* **139**, 1567–1583.
- Laws, K. M. and Drummond-Barbosa, D. (2017). Control of germline stem cell lineages by diet and physiology. *Results Probl. Cell Differ.* **59**, 67–99.
- Lee, C., Sorensen, E. B., Lynch, T. R. and Kimble, J. (2016). *C. elegans* GLP-1/Notch activates transcription in a probability gradient across the germline stem cell pool. *Elife* **5**, e18370.
- Lieber, T., Kidd, S. and Struhl, G. (2011). DSL-Notch signaling in the *Drosophila* brain in response to olfactory stimulation. *Neuron* **69**, 468–481.

- Michaelson, D., Korta, D. Z., Capua, Y. and Hubbard, E. J. A. (2010). Insulin signaling promotes germline proliferation in *C. elegans*. *Development* **137**, 671-680.
- Monteiro, R., Pinheiro, P., Joseph, N., Peterkin, T., Koth, J., Repapi, E., Bonkhofer, F., Kirmizitas, A. and Patient, R. (2016). Transforming growth factor beta drives hemogenic endothelium programming and the transition to hematopoietic stem cells. *Dev. Cell* **38**, 358-370.
- Morikawa, M., Koinuma, D., Tsutsumi, S., Vasilaki, E., Kanki, Y., Heldin, C.-H., Aburatani, H. and Miyazono, K. (2011). ChIP-seq reveals cell type-specific binding patterns of BMP-specific Smads and a novel binding motif. *Nucleic Acids Res.* **39**, 8712-8727.
- Nadarajan, S., Govindan, J. A., McGovern, M., Hubbard, E. J. A. and Greenstein, D. (2009). MSP and GLP-1/Notch signaling coordinately regulate actomyosin-dependent cytoplasmic streaming and oocyte growth in *C. elegans*. *Development* **136**, 2223-2234.
- Noyes, M. B. (2012). Analysis of specific protein-DNA interactions by bacterial one-hybrid assay. *Methods Mol. Biol.* **786**, 79-95.
- Noyes, M. B., Meng, X., Wakabayashi, A., Sinha, S., Brodsky, M. H. and Wolfe, S. A. (2008). A systematic characterization of factors that regulate *Drosophila* segmentation via a bacterial one-hybrid system. *Nucleic Acids Res.* **36**, 2547-2560.
- Oakes, B. L., Xia, D. F., Rowland, E. F., Xu, D. J., Ankoudinova, I., Borchardt, J. S., Zhang, L., Li, P., Miller, J. C., Rebar, E. J. et al. (2016). Multi-reporter selection for the design of active and more specific zinc-finger nucleases for genome editing. *Nat. Commun.* **7**, 10194.
- Ouellet, J., Li, S. and Roy, R. (2008). Notch signalling is required for both dauer maintenance and recovery in *C. elegans*. *Development* **135**, 2583-2592.
- Park, D., Estevez, A. and Riddle, D. L. (2010). Antagonistic Smad transcription factors control the dauer/non-dauer switch in *C. elegans*. *Development* **137**, 477-485.
- Patterson, G. I., Kowek, A., Wong, A., Liu, Y. and Ruvkun, G. (1997). The DAF-3 Smad protein antagonizes TGF-beta-related receptor signaling in the *Caenorhabditis elegans* dauer pathway. *Genes Dev.* **11**, 2679-2690.
- Pepper, A. S.-R., Killian, D. J. and Hubbard, E. J. A. (2003). Genetic analysis of *Caenorhabditis elegans* glp-1 mutants suggests receptor interaction or competition. *Genetics* **163**, 115-132.
- Praitis, V., Casey, E., Collar, D. and Austin, J. (2001). Creation of low-copy integrated transgenic lines in *Caenorhabditis elegans*. *Genetics* **157**, 1217-1226.
- Ren, P., Lim, C. S., Johnsen, R., Albert, P. S., Pilgrim, D. and Riddle, D. L. (1996). Control of *C. elegans* larval development by neuronal expression of a TGF-beta homolog. *Science* **274**, 1389-1391.
- Richards, G. S. and Degnan, B. M. (2010). The dawn of developmental signaling in the Metazoa. *Cold Spring Harb. Symp. Quant. Biol.* **74**, 81-90.
- Schackwitz, W. S., Inoue, T. and Thomas, J. H. (1996). Chemosensory neurons function in parallel to mediate a pheromone response in *C. elegans*. *Neuron* **17**, 719-728.
- Seydoux, G., Schedl, T. and Greenwald, I. (1990). Cell-cell interactions prevent a potential inductive interaction between soma and germline in *C. elegans*. *Cell* **61**, 939-951.
- Shin-i, T. and Kohara, Y. (1999). NEXTDB: the expression pattern map database for *C. elegans*. *Genome Inform.* **10**, 213-214.
- Sijen, T., Fleenor, J., Simmer, F., Thijssen, K. L., Parrish, S., Timmons, L., Plasterk, R. H. and Fire, A. (2001). On the role of RNA amplification in dsRNA-triggered gene silencing. *Cell* **107**, 465-476.
- Sims, J. R., Ow, M. C., Nishiguchi, M. A., Kim, K., Sengupta, P. and Hall, S. E. (2016). Developmental programming modulates olfactory behavior in *C. elegans* via endogenous RNAi pathways. *Elife* **5**, e11642.
- Singh, K., Chao, M. Y., Somers, G. A., Komatsu, H., Corkins, M. E., Larkins-Ford, J., Tucey, T., Dionne, H. M., Walsh, M. B., Beaumont, E. K. et al. (2011). *C. elegans* notch signaling regulates adult chemosensory response and larval molting quiescence. *Curr. Biol.* **21**, 825-834.
- Song, X., Call, G. B., Kirilly, D. and Xie, T. (2007). Notch signaling controls germline stem cell niche formation in the *Drosophila* ovary. *Development* **134**, 1071-1080.
- Starich, T. A., Hall, D. H. and Greenstein, D. (2014). Two classes of gap junction channels mediate soma-germline interactions essential for germline proliferation and gametogenesis in *Caenorhabditis elegans*. *Genetics* **198**, 1127-1153.
- Thatcher, J. D., Haun, C. and Okkema, P. G. (1999). The DAF-3 Smad binds DNA and represses gene expression in the *Caenorhabditis elegans* pharynx. *Development* **126**, 97-107.
- Yang, S.-A., Wang, W.-D., Chen, C.-T., Tseng, C.-Y., Chen, Y.-N. and Hsu, H.-J. (2013). FOXO/Fringe is necessary for maintenance of the germline stem cell niche in response to insulin insufficiency. *Dev. Biol.* **382**, 124-135.
- Zavadil, J., Cermak, L., Soto-Nieves, N. and Böttinger, E. P. (2004). Integration of TGF-beta/Smad and Jagged1/Notch signalling in epithelial-to-mesenchymal transition. *EMBO J.* **23**, 1155-1165.
- Zhang, X., Noguez, J. H., Zhou, Y. and Butcher, R. A. (2013). Analysis of ascarosides from *Caenorhabditis elegans* using mass spectrometry and NMR spectroscopy. *Methods Mol. Biol.* **1068**, 71-92.
